# Supplementary material
Source: MDPI journal article supplement (https://www.mdpi.com/2073-4344/13/9/1277)
Supplement: s1 [file s1]

## Support Information

**Table S1.** The FAL production from xylose catalyzed by FFS based solid acids in DES<sub>MLA</sub>-water (1/9, v/v) system.

| Catalyst                                             | FAL yield (%) |
|------------------------------------------------------|---------------|
| -                                                    | 32.0          |
| FFS                                                  | 34.8          |
| SnO <sub>2</sub> -FFS                                | 58.6          |
| SO <sub>4</sub> <sup>2-</sup> /SnO <sub>2</sub>      | 61.1          |
| SO <sub>4</sub> <sup>2-</sup> /SnO <sub>2</sub> -FFS | 70.5          |

Reaction conditions: 175 °C for 15 min in 40 mL working volume, 20 g/L Xylose, 20 g/L ZnCl<sub>2</sub>.
